# Supplementary material
Source: PubMed Central journal article supplement (PMC3865014)
Supplement: cc-12-3184-s01.pdf [file cc-12-3184-s01.pdf]

## **Supplemental Material to:**

**Agnes Wong, Sufang Zhang, Dana Mordue, Joseph M Wu,  
Zhongtao Zhang, Zbigniew Darzynkiewicz, Ernest YC Lee,  
and Marietta YWT Lee**

**PDIP38 is translocated to the spliceosomes/nuclear  
speckles in response to UV-induced DNA damage and is  
required for UV-induced alternative splicing of MDM2**

**Cell Cycle 2013; 12(19)**

**<http://dx.doi.org/10.4161/cc.26221>**

**<http://www.landesbioscience.com/journals/cc/article/26221>**

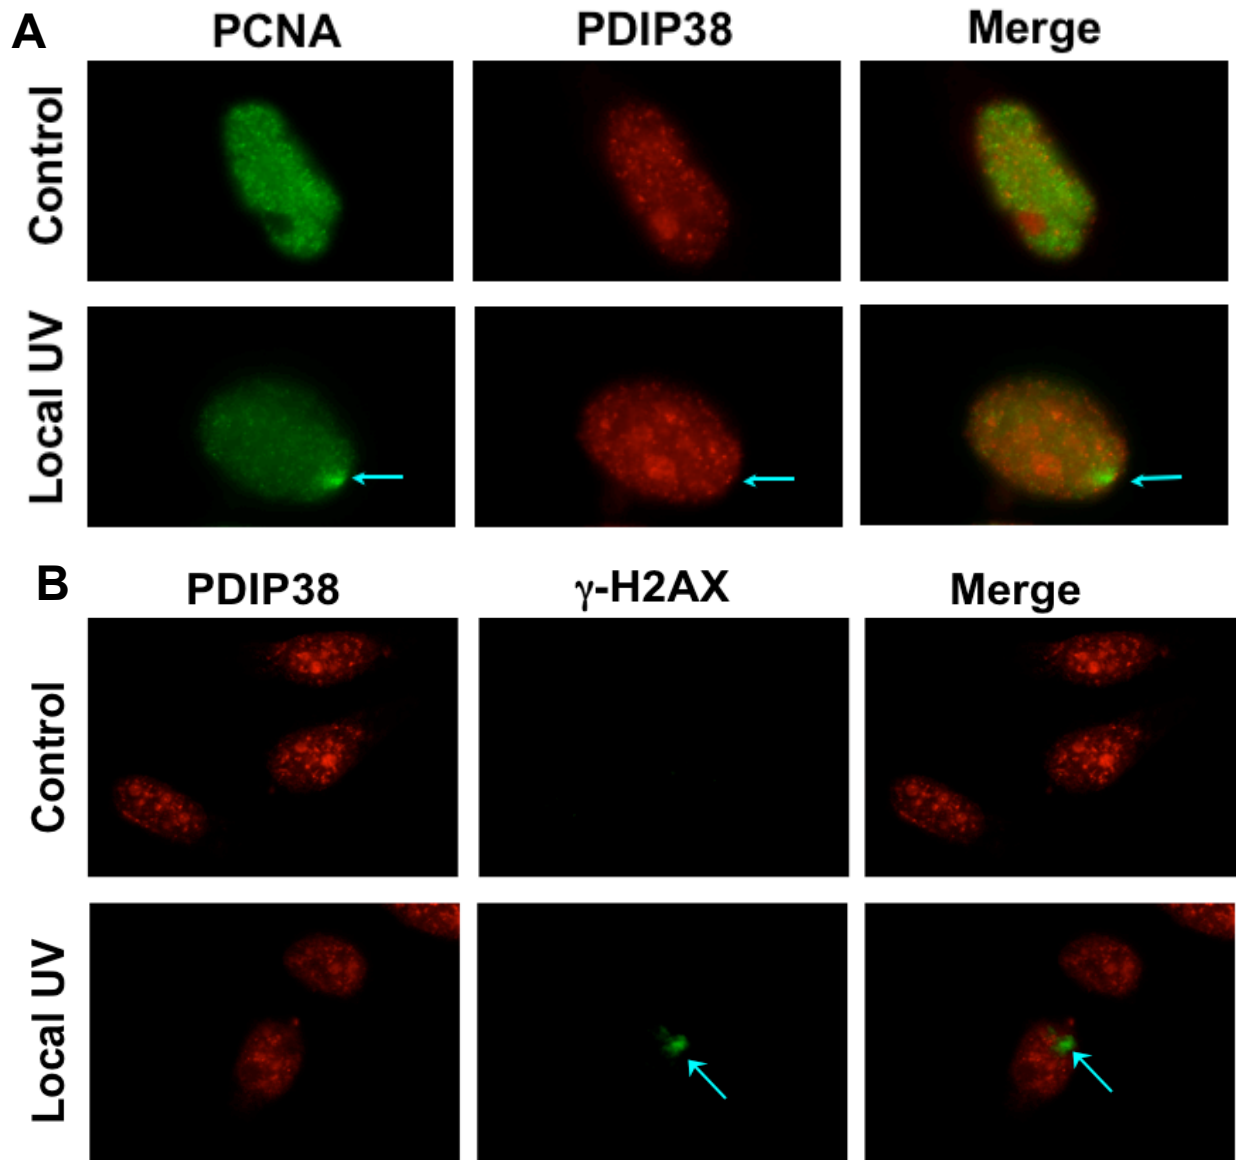

**Figure S1. PDIP38 is not transiently recruited to sites of local UV-induced damage.**

(A) HeLa cells were treated with UV irradiation ( $75 \text{ J/m}^2$ ) through Millipore polycarbonate filters containing  $5 \mu\text{M}$  pores. Cells were fixed 5 minutes post treatment and co-stained for PCNA and PDIP38. In this panel, PDIP38 was detected using red immunofluorescence and PCNA by green immunofluorescence (Materials and Methods).

(B) HeLa cells were treated with UV irradiation as above. Slides were co-stained for PDIP38 (red immunofluorescence) and  $\gamma$ -H<sub>2</sub>AX (green immunofluorescence). Images were captured with a Zeiss AxioVision at 100X magnification. The blue arrows mark the regions of local UV irradiation.

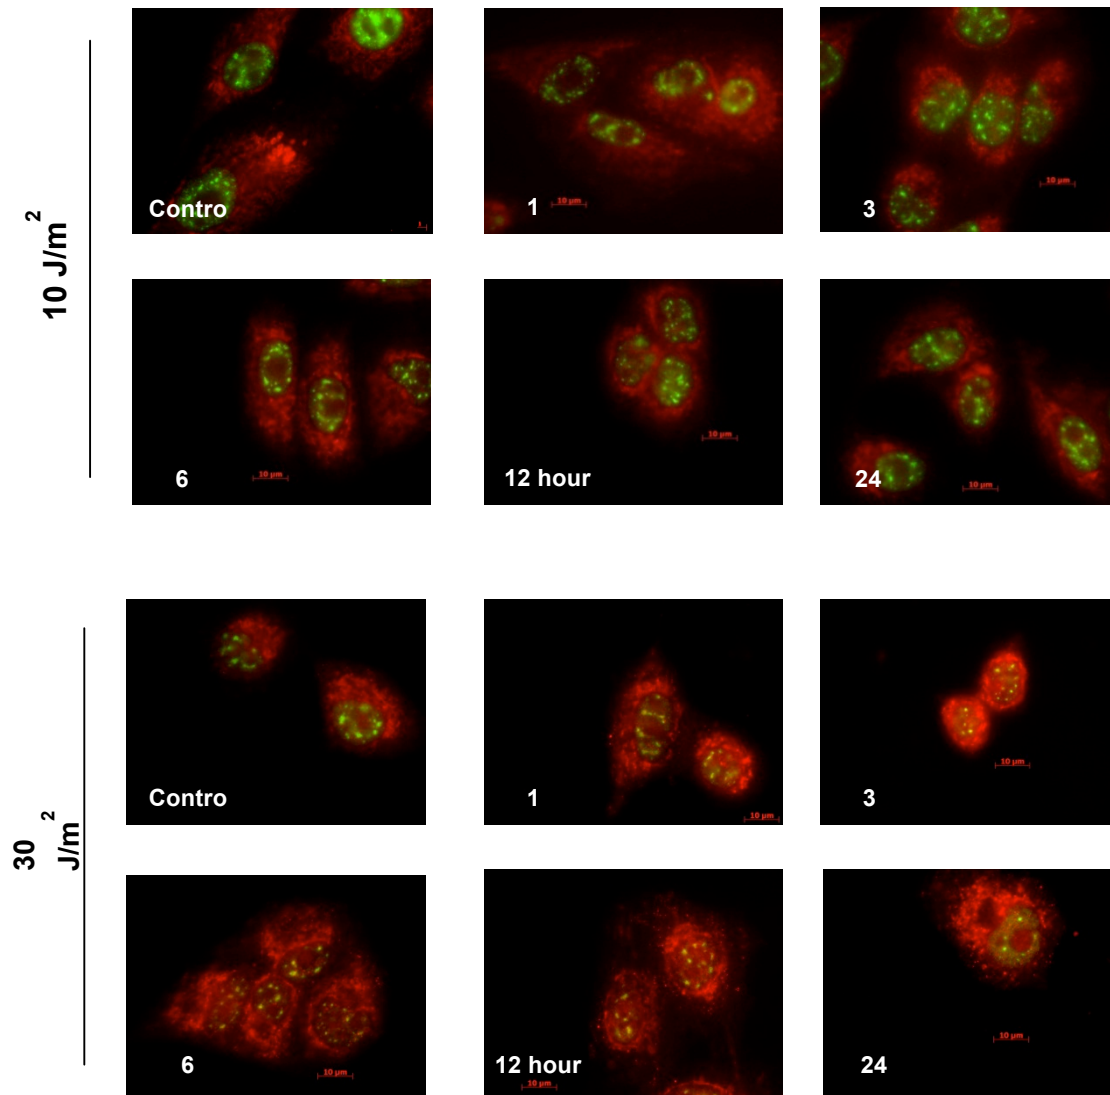

**Figure S2. PDIP38 is recruited to nuclear spliceosomes in response to UV-induced DNA damage.** A549 cells were globally irradiated with several doses of UV (10-30 J/m<sup>2</sup>) and allowed to recover between 1-24 h. Cells were fixed and stained for PDIP38 (red immunofluorescence) and SC35 (green immunofluorescence). Images shown are the merged images. Images were captured with a Zeiss AxioVision at 100X magnification.
